# Supplementary material for: Systematic benefit-risk assessment for buprenorphine implant: a semiquantitative method to support risk management
Source: HighWire-hosted journal article supplement (doi:10.1136/bmjebm-2019-111295), 2020-02-24
Supplement: bmjebm-2019-111295supp001_data_supplement.pdf [file bmjebm-2019-111295supp001_data_supplement.pdf]

## Supplementary material

A summary benefit-risk table was created to allow visualisation of the magnitude of each benefit and risk. Risk differences and corresponding 95% confidence intervals (CI) were calculated for each outcome where both numerator (number of events) and denominator (number of patients at risk) were available. Where spontaneous reporting data were used to examine an outcome, only the reporting odds ratio (ROR) could be calculated with 95% CI. For the ROR, a spontaneous reporting database is considered source data for a case-control study, therefore the ROR can be used to estimate relative risk<sup>1</sup>.

1. Rothman KJ, Lanes S, Sacks ST. The reporting odds ratio and its advantages over the proportional reporting ratio. *Pharmacoepidemiol Drug Saf* 2004;13:519–23. doi:10.1002/pds.1001

**Supplementary Table 1. Data for key benefits and risks identified for buprenorphine implant**

| Outcome name                            | Study                                                                           | Study primary outcome                    | Total sample size   | Implant BPN risk estimate | Implant BPN number of patients | Implant BPN number of events | S/L BPN risk estimate | S/L BPN number of patients | S/L BPN number of events | RD point estimate | RD lower 95% CI | RD upper 95% CI | ROR  | ROR lower 95% CI | ROR upper 95% CI |
|-----------------------------------------|---------------------------------------------------------------------------------|------------------------------------------|---------------------|---------------------------|--------------------------------|------------------------------|-----------------------|----------------------------|--------------------------|-------------------|-----------------|-----------------|------|------------------|------------------|
| <b>Benefits</b>                         |                                                                                 |                                          |                     |                           |                                |                              |                       |                            |                          |                   |                 |                 |      |                  |                  |
| Improved compliance and convenience     | Carter et al                                                                    | Cost-effectiveness of implant vs S/L BPN | n/a (modelled data) | 0.78                      |                                |                              | 0.58                  |                            |                          | 0.20              |                 |                 |      |                  |                  |
| Reduced risk of illicit opioid use      | PRO-814 <sup>#</sup>                                                            | Evidence of illicit opioid use           | 173*                | 0.96                      | 84                             | 81                           | 0.88                  | 89                         | 78                       | 0.09              | 0.01            | 0.17            |      |                  |                  |
| Quality of life measures                | Carter et al                                                                    | Cost-effectiveness of implant vs S/L BPN | n/a (modelled data) | 0.83                      |                                |                              | 0.80                  |                            |                          | 0.03              |                 |                 |      |                  |                  |
| Risk of misuse and diversion            | FAERS                                                                           | None (database)                          | 3924*               |                           | 72                             | 1                            |                       | 3852                       | 375                      |                   |                 |                 | 0.13 | 0.02             | 0.94             |
| <b>Risks</b>                            |                                                                                 |                                          |                     |                           |                                |                              |                       |                            |                          |                   |                 |                 |      |                  |                  |
| Migration/missing implant               | PRO-806 <sup>#</sup> and PRO-814 <sup>#</sup>                                   | Evidence of illicit opioid use           | 290                 | 0.01                      | 201                            | 2                            | 0.00                  | 89                         | 0                        | 0.01              | 0.00            | 0.02            |      |                  |                  |
| Clinically Significant Implant Breakage | PRO-806 <sup>#</sup> , PRO-814 <sup>#</sup> and post-marketing reports in PADER | Evidence of illicit opioid use           | 1233                | 0.01                      | 1144                           | 6                            | 0.00                  | 89                         | 0                        | 0.01              | 0.00            | 0.01            |      |                  |                  |
| Infection at insertion / removal site   | PRO-806 <sup>#</sup> and PRO-814 <sup>#</sup>                                   | Evidence of illicit opioid use           | 290                 | 0.09                      | 201                            | 18                           | 0.01                  | 89                         | 1                        | 0.08              | 0.03            | 0.12            |      |                  |                  |
| Implant related allergic reaction       | PRO-806 <sup>#</sup> and PRO-814 <sup>#</sup>                                   | Evidence of illicit opioid use           | 290                 | 0.08                      | 201                            | 16                           | 0.01                  | 89                         | 1                        | 0.07              | 0.03            | 0.11            |      |                  |                  |

BPN=Buprenorphine; S/L=sublingual; RD=Risk difference; CI= Confidence Interval; ROR=Reporting odds ratio; FAERS= FDA Adverse Event Reporting System; PADER= Periodic Adverse Drug Experience Report; \*=minimum 80% power to detect difference; # clinical trials were powered to detect a difference between sublingual buprenorphine and buprenorphine implant for the primary outcome

**Supplementary Table 2. Benefit-Risk summary table for key benefits and risks identified for buprenorphine implant and sublingual buprenorphine**

| <b>Outcome name</b>                     | <b>Implant BPN risk/1000 pts</b> | <b>S/L BPN risk/1000 pts</b> | <b>RD (95% CI)/1000 pts</b> | <b>ROR (95% CI)</b> |
|-----------------------------------------|----------------------------------|------------------------------|-----------------------------|---------------------|
| <b>Benefits</b>                         |                                  |                              |                             |                     |
| Improved compliance and convenience     | 780                              | 580                          | 200 (-, -)                  |                     |
| Reduced risk of illicit opioid use      | 964                              | 876                          | 88 (9, 167)                 |                     |
| Quality of life measures                | 832                              | 801                          | 31 (-, -)                   |                     |
| Risk of misuse and diversion            | -                                | -                            | -                           | 0.13                |
| <b>Risks</b>                            |                                  |                              |                             |                     |
| Migration/missing implant               | 10                               | 0                            | 10 (-4, 24)                 |                     |
| Clinically Significant Implant Breakage | 5                                | 0                            | 5 (1, 9)                    |                     |
| Infection at insertion / removal site   | 90                               | 11                           | 78 (33, 123)                |                     |
| Implant related allergic reaction       | 80                               | 11                           | 68 (25, 112)                |                     |

BPN=buprenorphine; S/L= sublingual; RD=risk difference; CI=confidence interval; ROR=reporting odds ratio

**Supplementary Table 3. Swing weights assigned to key benefits and risks (normalised)**

| Ranking | Outcome                                 | Swing Weight (normalised) |
|---------|-----------------------------------------|---------------------------|
| 1       | Improved compliance and convenience     | 100                       |
| 2       | Reduced risk of illicit opioid use      | 100                       |
| 3       | Migration/missing implant               | 80                        |
| 4       | Clinically significant implant breakage | 70                        |
| 5       | Quality of life measures                | 60                        |
| 6       | Infection at insertion/removal site     | 35                        |
| 7       | Implant related allergic reaction       | 25                        |

**Formula for calculation of wNCB (Sutton et al., 2005)**

Expected net Clinical benefit =  $\sum$  Expected benefits from treatment -  $\sum$  Expected harms from treatment

Expected benefits From treatment = (Probuphine proportion - S/L BPN proportion) x weight

Expected harms From treatment = (Probuphine proportion - S/L BPN proportion) x weight

**Supplementary Table 4. Weighted net clinical benefit (wNCB) for buprenorphine implant**

| Outcomes                                | Weights (%)         | Point estimate difference x weight |
|-----------------------------------------|---------------------|------------------------------------|
| <b>Benefits</b>                         |                     |                                    |
| Reduced risk of illicit opioid use      | 21                  | 1.68                               |
| Improved compliance and convenience     | 21                  | 4.20                               |
| Quality of Life                         | 13                  | 0.39                               |
| <b>Risks</b>                            |                     |                                    |
| Migration/missing implant               | 17                  | 0.17                               |
| Clinically significant implant breakage | 15                  | 0.15                               |
| Infection at insertion/removal site     | 8                   | 0.64                               |
| Implant related allergic reaction       | 5                   | 0.35                               |
|                                         | <b>Overall wNCB</b> | <b>4.96</b>                        |

wNCB=weighted net clinical benefit

***Sensitivity analysis of weighting approach***

To examine the robustness of the assigned weights and whether significant changes would alter the benefit-risk profile for buprenorphine implant, we examined three scenarios where different swing weights were assigned.

The first scenario examined the change in wNCB if the weights for each benefit were reduced by a third and the weights for each risk increased in equal proportions. The wNCB remained positive at 2.12, despite the total weighting of the benefits decreasing to 37%.

The second scenario examined the change in wNCB if the weights for each benefit were halved and the weights for each risk increased in equal proportions. The wNCB remained positive at 0.66, despite the total weighting of the benefits decreasing to 27.5%.

For the final scenario, the change in wNCB was examined if the weights for each benefit were decreased by two-thirds and the weights for each risk increased in equal proportions. The wNCB would become negative in this scenario at -0.80, because the benefit weights are only contributing a total of 18%.
